# Supplementary material
Source: MDPI journal article supplement (https://www.mdpi.com/2077-1312/10/7/941)
Supplement: s1 [file s1]

|    |                | PE   | SS   | AG   | LV   | RC   | CLM  | RG   | CSP  | BT   | IO   | SJ   | Va   | BC   | PP   | Us   | BBS  | CB   | BL   | AI   | IG   | Ma   | IM   | BA   |
|----|----------------|------|------|------|------|------|------|------|------|------|------|------|------|------|------|------|------|------|------|------|------|------|------|------|
| M2 | a°             | 3.35 | 3.31 | 2.93 | 2.92 | 2.89 | 2.88 | 2.75 | 2.28 | 1.27 | 0.96 | 0.76 | 0.58 | 0.89 | 1.1  | 0.55 | 0.69 | 0.55 | 0.54 | 0.57 | 0.54 | 0.54 | 0.54 | 0.5  |
|    | a <sup>m</sup> | 4.08 | 4.08 | 3.71 | 3.51 | 3.51 | 3.51 | 3.26 | 2.68 | 1.42 | 0.96 | 0.65 | 0.6  | 0.62 | 0.59 | 0.54 | 0.68 | 0.59 | 0.52 | 0.57 | 0.57 | 0.57 | 0.57 | 0.53 |
|    | g°             | 351  | 348  | 343  | 342  | 342  | 341  | 337  | 325  | 300  | 287  | 277  | 276  | 276  | 305  | 239  | 260  | 279  | 236  | 241  | 252  | 252  | 252  | 251  |
|    | g <sup>m</sup> | 331  | 331  | 326  | 319  | 319  | 319  | 315  | 302  | 281  | 282  | 273  | 269  | 267  | 267  | 235  | 253  | 267  | 233  | 239  | 249  | 249  | 251  | 258  |
| S2 | a°             | 0.85 | 0.87 | 0.75 | 0.78 | 0.78 | 0.78 | 0.69 | 0.56 | 0.33 | 0.24 | 0.18 | 0.13 | 0.22 | 0.25 | 0.06 | 0.17 | 0.12 | 0.05 | 0.07 | 0.08 | 0.08 | 0.08 | 0.12 |
|    | a <sup>m</sup> | 0.6  | 0.6  | 0.54 | 0.51 | 0.51 | 0.51 | 0.47 | 0.38 | 0.2  | 0.14 | 0.09 | 0.08 | 0.08 | 0.08 | 0.04 | 0.1  | 0.08 | 0.04 | 0.03 | 0.04 | 0.04 | 0.04 | 0.07 |
|    | g°             | 50   | 43   | 38   | 39   | 38   | 38   | 33   | 19   | 351  | 342  | 327  | 320  | 325  | 359  | 251  | 310  | 318  | 244  | 264  | 292  | 292  | 291  | 296  |
|    | g <sup>m</sup> | 65   | 65   | 60   | 52   | 52   | 52   | 47   | 33   | 6    | 0    | 344  | 338  | 339  | 338  | 192  | 326  | 338  | 182  | 215  | 299  | 299  | 308  | 325  |
| N2 | a°             | 0.76 | 0.74 | 0.71 | 0.72 | 0.71 | 0.71 | 0.68 | 0.52 | 0.32 | 0.24 | 0.18 | 0.14 | 0.21 | 0.26 | 0.14 | 0.15 | 0.13 | 0.14 | 0.14 | 0.13 | 0.13 | 0.13 | 0.13 |
|    | a <sup>m</sup> | 1.07 | 1.07 | 0.98 | 0.93 | 0.93 | 0.93 | 0.86 | 0.71 | 0.38 | 0.27 | 0.18 | 0.17 | 0.17 | 0.16 | 0.17 | 0.18 | 0.16 | 0.16 | 0.17 | 0.16 | 0.16 | 0.16 | 0.15 |
|    | g°             | 324  | 314  | 314  | 313  | 313  | 313  | 308  | 294  | 256  | 249  | 246  | 242  | 242  | 275  | 200  | 225  | 252  | 194  | 205  | 211  | 211  | 212  | 215  |
|    | g <sup>m</sup> | 326  | 326  | 322  | 316  | 316  | 316  | 311  | 299  | 278  | 279  | 271  | 267  | 265  | 265  | 226  | 252  | 265  | 224  | 230  | 244  | 244  | 246  | 256  |
| O1 | a°             | 0.23 | 0.23 | 0.22 | 0.2  | 0.19 | 0.2  | 0.19 | 0.18 | 0.17 | 0.17 | 0.17 | 0.16 | 0.16 | 0.17 | 0.15 | 0.16 | 0.17 | 0.16 | 0.15 | 0.15 | 0.15 | 0.16 | 0.16 |
|    | a <sup>m</sup> | 0.19 | 0.19 | 0.18 | 0.18 | 0.18 | 0.18 | 0.18 | 0.17 | 0.16 | 0.11 | 0.13 | 0.2  | 0.14 | 0.21 | 0.18 | 0.21 | 0.21 | 0.18 | 0.19 | 0.19 | 0.19 | 0.19 | 0.17 |
|    | g°             | 59   | 56   | 57   | 57   | 54   | 55   | 55   | 54   | 54   | 55   | 54   | 54   | 54   | 54   | 56   | 54   | 54   | 55   | 56   | 58   | 58   | 58   | 55   |
|    | g <sup>m</sup> | 62   | 62   | 62   | 59   | 59   | 59   | 59   | 57   | 58   | 46   | 63   | 62   | 31   | 37   | 32   | 52   | 37   | 32   | 33   | 40   | 40   | 41   | 47   |
| K1 | a°             | 0.25 | 0.26 | 0.26 | 0.27 | 0.27 | 0.27 | 0.27 | 0.25 | 0.19 | 0.18 | 0.18 | 0.16 | 0.18 | 0.18 | 0.2  | 0.19 | 0.17 | 0.2  | 0.2  | 0.18 | 0.18 | 0.18 | 0.19 |
|    | a <sup>m</sup> | 0.42 | 0.42 | 0.39 | 0.38 | 0.38 | 0.38 | 0.37 | 0.34 | 0.25 | 0.3  | 0.23 | 0.12 | 0.32 | 0.25 | 0.27 | 0.13 | 0.25 | 0.27 | 0.28 | 0.26 | 0.26 | 0.26 | 0.22 |
|    | g°             | 122  | 122  | 115  | 114  | 114  | 113  | 112  | 105  | 102  | 105  | 101  | 101  | 98   | 98   | 104  | 98   | 97   | 103  | 105  | 106  | 106  | 106  | 100  |
|    | g <sup>m</sup> | 123  | 123  | 122  | 117  | 117  | 117  | 115  | 107  | 100  | 103  | 99   | 121  | 123  | 145  | 107  | 126  | 145  | 106  | 109  | 116  | 116  | 117  | 121  |

**Table S1.** Observed (O) and Modeled (M) Amplitude (A) and Phase (P) expressed in m and degrees of the main harmonic constituents at the whole set of tidal stations analysed in D’Onofrio et al., (2016). Red characters indicate stations located inside the Beagle Channel and at its Eastern mouth along the southern Tierra del Fuego coastline.
